# Supplementary material for: Discovery of antimicrobial peptides clostrisin and cellulosin from Clostridium: insights into their structures, co-localized biosynthetic gene clusters, and antibiotic activity
Source: publisher site journal article supplement (doi:10.3762/bjoc.20.159), 2024-07-30
Supplement: Additional file 1 [file 1860-5397-20-159-S1.pdf]

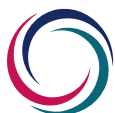

## Supporting Information

for

### **Discovery of antimicrobial peptides clostrisin and cellulysin from *Clostridium*: insights into their structures, co-localized biosynthetic gene clusters, and antibiotic activity**

Moisés Alejandro Alejo Hernandez, Katia Pamela Villavicencio Sánchez, Rosendo Sánchez Morales, Karla Georgina Hernández-Magro Gil, David Silverio Moreno-Gutiérrez, Eddie Guillermo Sanchez-Rueda, Yanet Teresa-Cruz, Brian Choi, Armando Hernández Garcia, Alba Romero-Rodríguez, Oscar Juárez, Siseth Martínez-Caballero, Mario Figueroa and Corina-Diana Ceapă

*Beilstein J. Org. Chem.* **2024**, *20*, 1800–1816. [doi:10.3762/bjoc.20.159](https://doi.org/10.3762/bjoc.20.159)

## Additional Figures and Tables



between I28 and G41. T31 and S35 are the only possible residues that can be dehydrated by CloM2.

5. S42 is macrocyclized (i.e. forms a lanthionine bridge).
  - a. Supporting observation: No fragmentation was observed past S42. If S42 were not macrocyclized, the most N-terminal residue able to form a macrocycle is C52. Then, S42-G51 would be linear, in which extensive MS2 fragmentation would be expected.
6. (medium-level confidence) C64 is macrocyclized.

Supporting observation:  $y_1$  not observed. If C64 were not macrocyclized,  $y_1$  and  $y_2$  could be observed. C62 might be macrocyclized, likely suppressing  $y_2$  fragmentation. However, a high level of  $y_1$  fragmentation would be expected. Normally, with lanthipeptides, if the last residue is linear, there is a tendency for a high intensity of  $y_1$  ion.

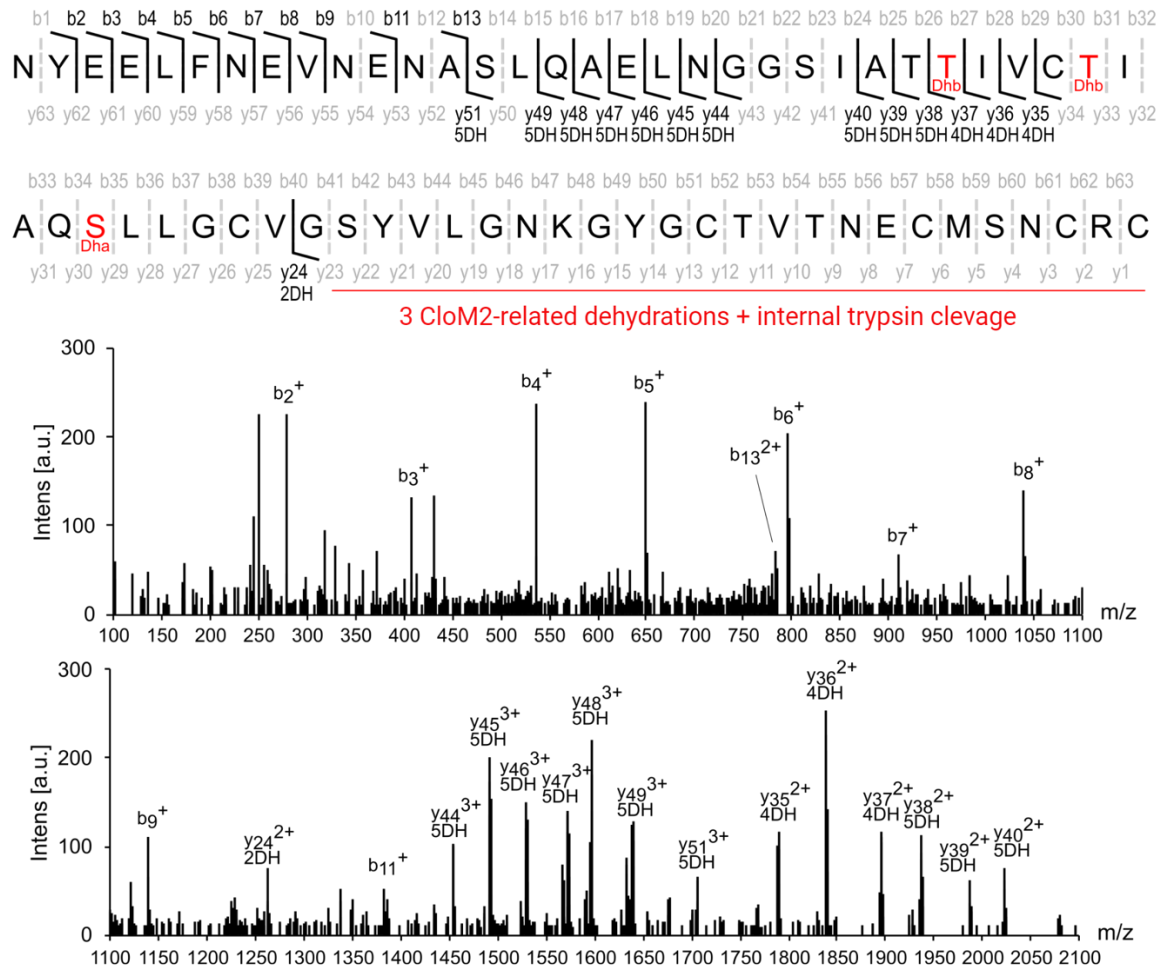

**Figure S2.** MS<sup>2</sup> experiment on the CloM2-modified the tryptic fragment from N24 to C-terminal of the CloA2 precursor peptide after iodoacetamide reaction, harboring 6 net dehydrations and 1 alkylation.

- Parent ion target  $m/z$ :  $1345.0 \pm 1.3$  ( $z=5$ )

- Collision energy: 43.6 V
- Retention time range: 17.11 – 17.25 min

**High-level confidence conclusions:**

1. C30 and C39 are macrocyclized.
  - a. Supporting observation:  $y_{35}$  and  $y_{24}$  are alkylated (+57 Da), meaning there is no free cysteine in between.
2. There are three macrocycles between G41 and the C-terminus.
  - a. Supporting observation:  $y_{24}$  is alkylated. There are four cysteines and 1 alkylation, so one of the cysteines must be free. Three cysteines form (methyl)lanthionine bridges.

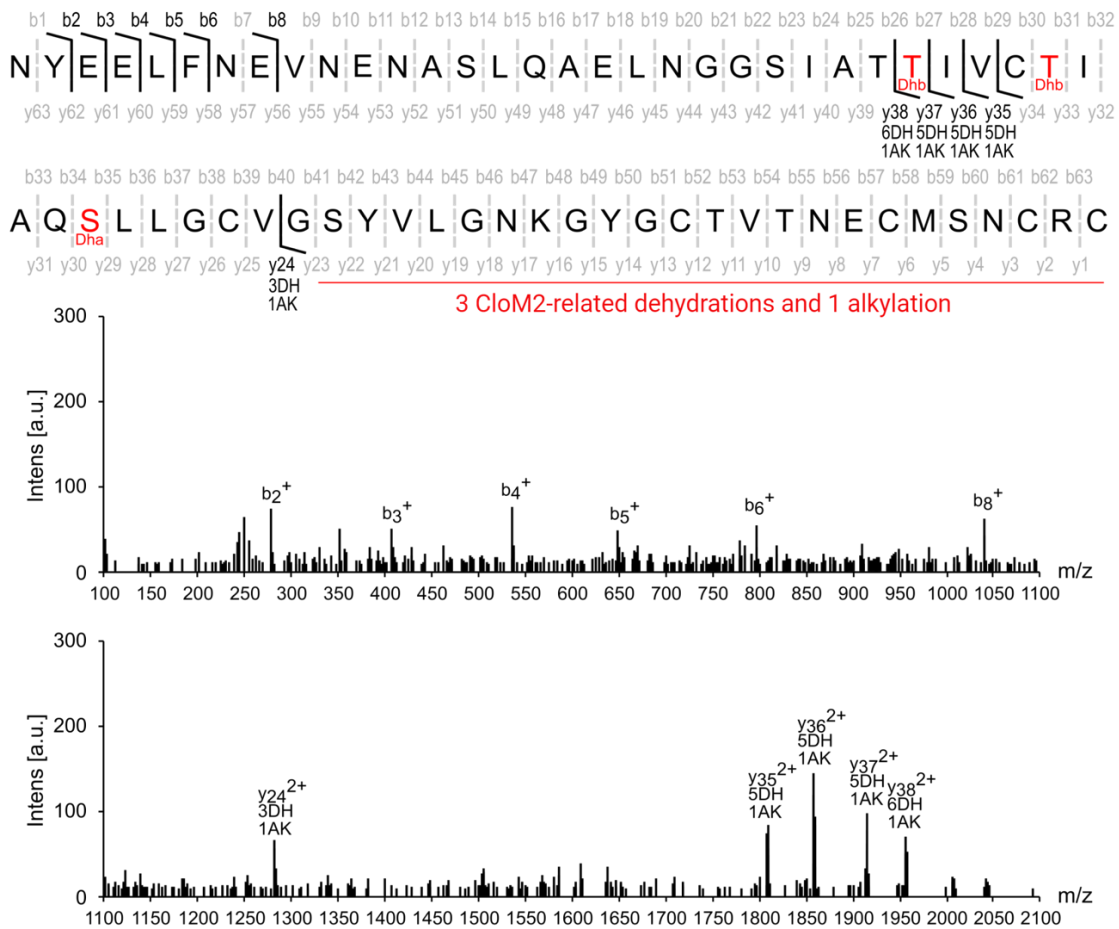

**Figure S3.** MS<sup>2</sup> experiment on the CloM2-modified the tryptic fragment from N24 to C-terminal of the CloA2 precursor peptide harboring 5 net dehydrations.

- Parent ion target  $m/z$ :  $1337.2 \pm 1.3$  ( $z=5$ )
- Collision energy: 43.3 V
- Retention time range: 14.67 – 15.11 min

### Supplementary note 2: Results explanations:

1. The high-level confidence conclusions are the same as from the MS<sup>2</sup> experiment on the 6-fold dehydrated CloA2 precursor peptide tryptic fragment.
2. One internal tryptic cleavage between G41 and the C-terminus is suggested. K48 and R63 are possible trypsin cleavage sites. If C64 is macrocyclized, then K48 is the most likely cleaved by trypsin.

Detected MS<sup>2</sup> ions are presented in Tables S6 to S9.

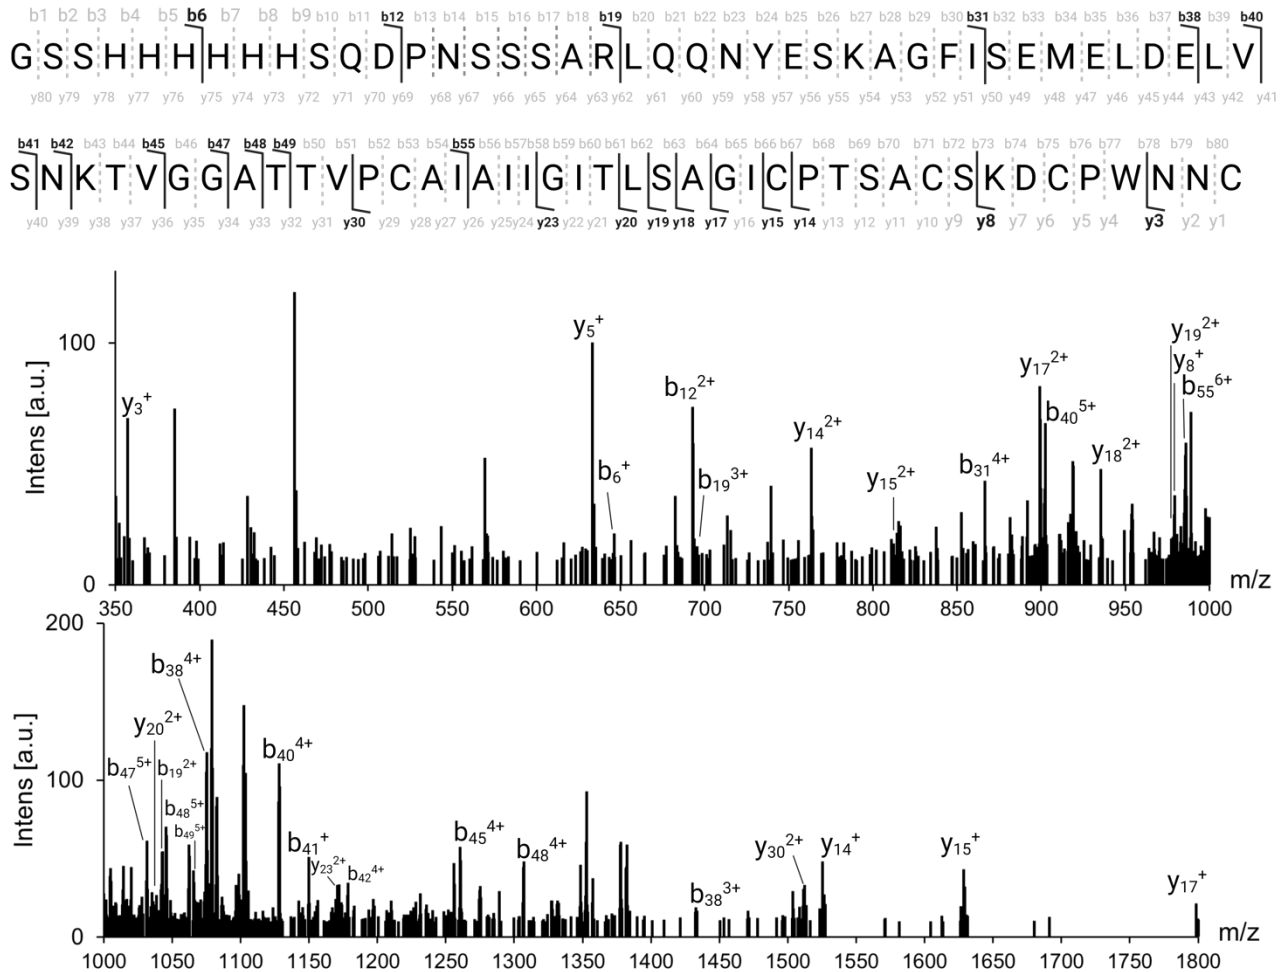

**Figure S4.** MS<sup>2</sup> experiment of CloA1 precursor peptide, linear peptide, with no post translational modifications.

- Parent ion target  $m/z$ :  $1069.0 \pm 1.3$  ( $z=8$ )
- Collision energy: 33.68 V

Retention time range: 14.67 – 15.11 min

### Supplementary note 3: Results explanation:

The high-level confidence conclusions are that CloA1 precursor peptide is a linear peptide without posttranslational modifications.

Detected MS<sup>2</sup> ions are presented in Tables S10 to S13.

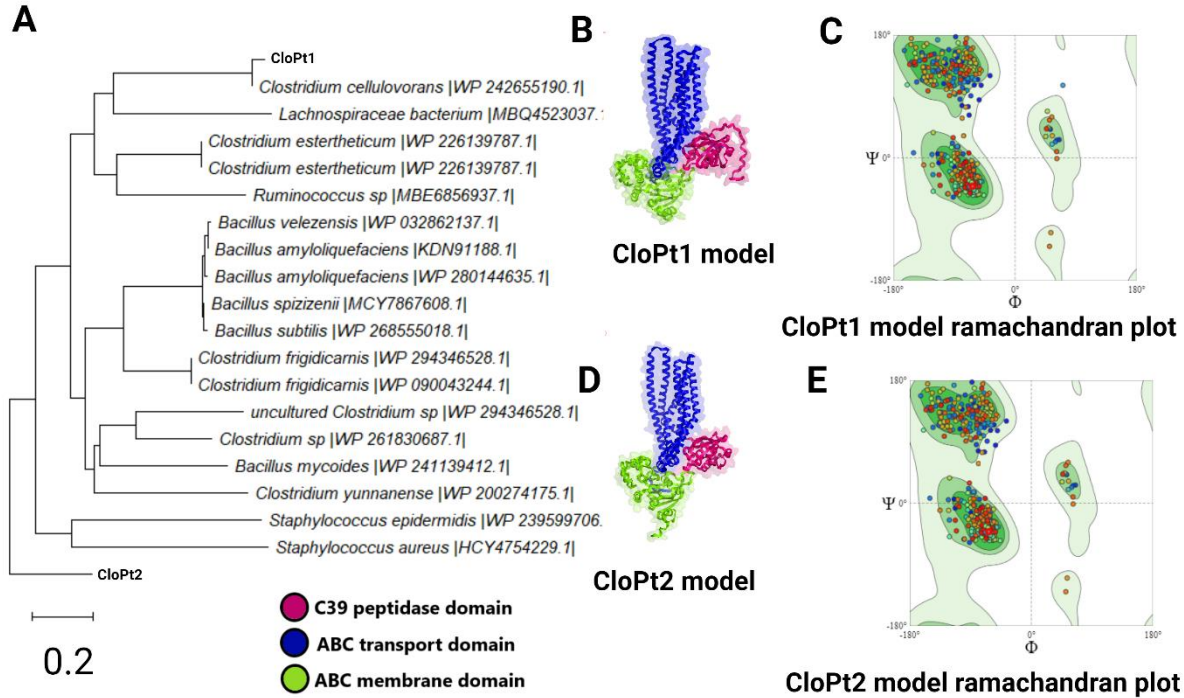

**Figure S5.** **A.** Phylogenetic tree with the amino acid sequences closest to the C39 peptidase domains of CloPt1 and CloPt2, models **B** and **D** generated with AlphaFold 2.0, minimized with Chimera, figures **C** and **E**, Ramachandran plots of the models for CloPt1 with favored Ramachandran of 96.85% and for CloPt2 with favored Ramachandran of 96.66%.

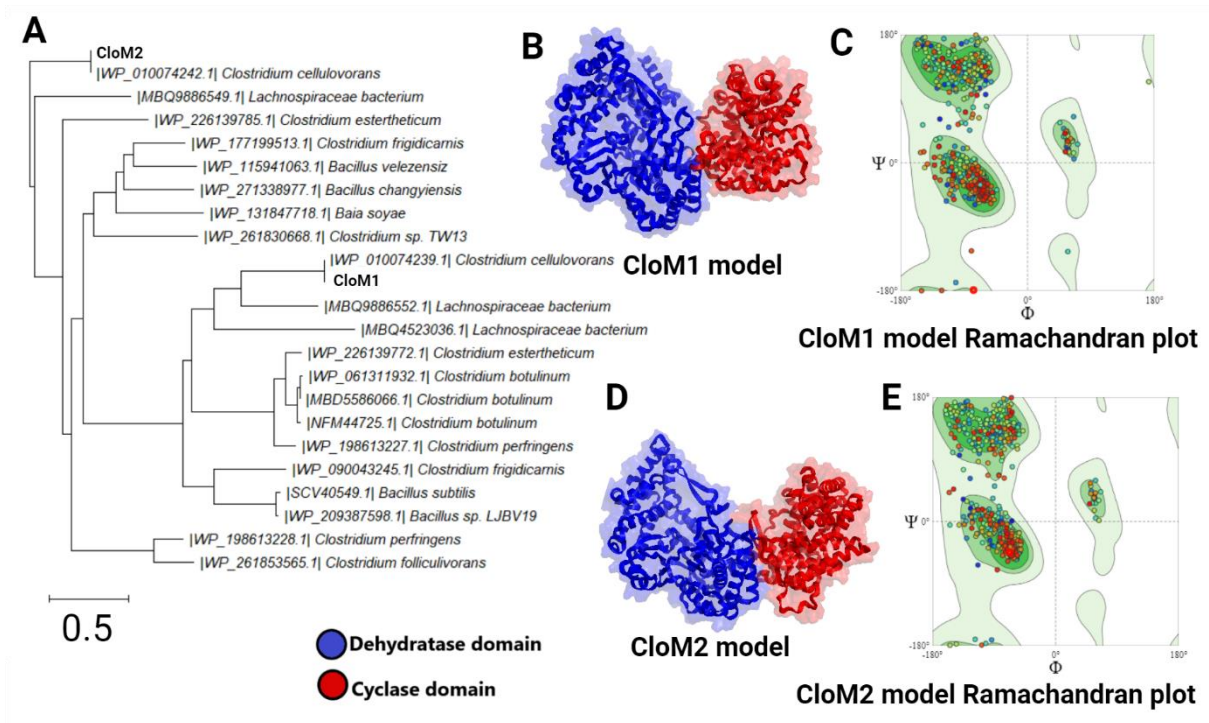

**Figure S6.** **A.** Phylogenetic tree with the amino acid sequences closest to the total proteins CloM1 and CloM2, models **B** and **D** generated with AlphaFold 2.0, minimized with Chimera, figures **C** and **E**, Ramachandran plots of the models for CloM1 with favored Ramachandran of 96.93% and for CloM2 with favored Ramachandran of 97.21%.

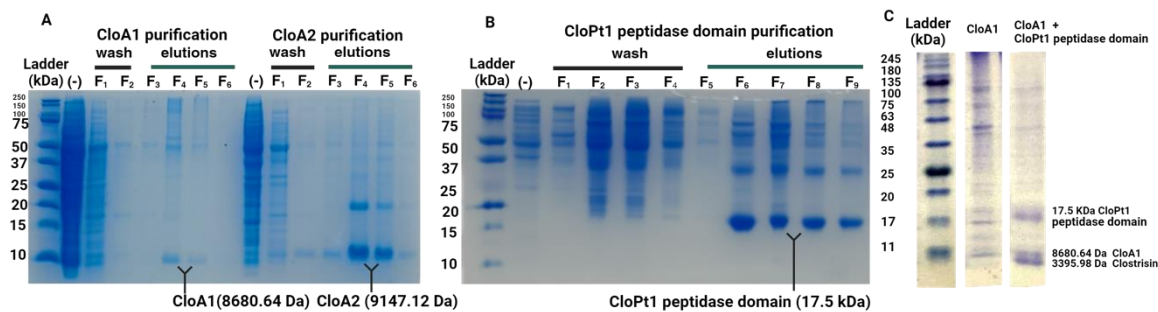

**Figure S7.** Main product purification SDS-PAGE electrophoresis gels. "F" denotes fractions, and (-) denotes the lysis sample. The non-native and native purification process is described in the methodology section. **A.** 12% SDS-PAGE gel of the nickel affinity non-native purification for CloA1 precursor peptide (8.3 kDa) and CloA2 precursor peptide (9.2 kDa). **B.** 12% SDS-PAGE gel of the nickel affinity native purification for CloPt1 peptidase domain. Fractions from 6 to 9 display lanes demonstrating the presence of the C39 peptidase domain (17.5 kDa). **C.** Proteolytic activity of CloA1 was monitored after 48 hours at 4 °C in the reaction mixtures, as described in the methodology section.

**Table S1:** Nucleotide sequences for the genes *cloA1*, *cloM1*, *cloPt1*, *cloA2*, *cloM2*, and *cloPt2* and amino acid sequences for the corresponding proteins.

| Sequence information in fasta format                                                                                                                                                                                                                                                                                                                                                                                                                                                                                                                                                                                                                                                                                                                                                                                                                                                                                                                                                                                                                                                                                                                                                                                                                                                                                                                                                                                                                                                                                                                                                                                                                                                                                                                                                                                                                                                                                                                                                                                                                                                                                                                                                                                                                                                                                                                                                                                                                                                                                                                                                                                                                                                                                                                                                                                        |
|-----------------------------------------------------------------------------------------------------------------------------------------------------------------------------------------------------------------------------------------------------------------------------------------------------------------------------------------------------------------------------------------------------------------------------------------------------------------------------------------------------------------------------------------------------------------------------------------------------------------------------------------------------------------------------------------------------------------------------------------------------------------------------------------------------------------------------------------------------------------------------------------------------------------------------------------------------------------------------------------------------------------------------------------------------------------------------------------------------------------------------------------------------------------------------------------------------------------------------------------------------------------------------------------------------------------------------------------------------------------------------------------------------------------------------------------------------------------------------------------------------------------------------------------------------------------------------------------------------------------------------------------------------------------------------------------------------------------------------------------------------------------------------------------------------------------------------------------------------------------------------------------------------------------------------------------------------------------------------------------------------------------------------------------------------------------------------------------------------------------------------------------------------------------------------------------------------------------------------------------------------------------------------------------------------------------------------------------------------------------------------------------------------------------------------------------------------------------------------------------------------------------------------------------------------------------------------------------------------------------------------------------------------------------------------------------------------------------------------------------------------------------------------------------------------------------------------|
| <p><b>&gt; <i>cloPt1</i></b><br/>           ATGAAGTTGTTTGAATAGATATAACTGAAATATTTTCGCTATCTTTTAGGAAGGAAAAGTATGTTATGAA<br/>           AAAGGTCGATATAGTAAAGCAAATATCTCAAACAGAATGTGGGGTATGTTGTTGTGTAATGATTCAAAATT<br/>           ATTATAATGTTAATACTTCATTAGGGCAGGTTAGAAAAGAATTAGATGTTGGCCGAGATGGAATGTCAATG<br/>           ATTCAGATTTATGAGTACTTAACAAGTAAAGGCTTTTCATGCAAACCTTCAAGACAAATAATGTTCTTAAG<br/>           CTATCTGAGATTACGTTGCCATGCATTGCTTTTTTTGGTGAATAATCATTTTGTGTTGTTGAATCAATAAAA<br/>           AATCAAAAGGTTATTGTCTGCAATCCAAGTATTGGAAGAAAAGTTATGTCAATTCAGGAGTTTGATAAAGA<br/>           TTTTAGTGGAATAATTCTACAAGTGTACCTACAGATAAAGTTGAAAAAGTTTCAAAGAAAAGAAAACCCAT<br/>           GGCATGTAGTTATTAAGTTGTTAAAAGAAAACAAGCGTTTACTCCTTGTAGCAGTATTATATATGATCCTAG<br/>           CATATGCTATATACTTGGGTGTACCCATGTTTGAACAAAATTTGATAGATAAAGTAATAGTTTTATCTAACC<br/>           TTGATACAGTCTATATTTTCTCATTAAATTTTAGGTTGTTTACTTATTGGCTATGCAATTATTAGCCTTTTGA<br/>           GAGGATTTAAGTTATTAACCTTAAATATTAATATAGCTAATAAGATGGAGATTGGAACGTATAATAAATTA<br/>           TTACGACTTCCATATAAGTATTTTGAAGTTAGAAATACTGGGGAATTATTGTATAGTTTAAATCTGTGTTTCT<br/>           TCTGTAAGAGAACTATTAGCTACATATATTGTTAATGGAGTAATAGATGTTGGTGCAGTGATAATAGTAAG<br/>           TATATATATGTTTCAGAAGTCATGGTTATTAGGAATTTTGGCTTTAGTTTATGGATACTAAACGTAGTTTT<br/>           TTTATTTTAAATGCAGCCTAAGTTAAGTGGAGTTGTTGATGAAGAATTAGTGCAAAGAGCTACTGCACAATC<br/>           GTTACAAACAGAAGCTTTAGGATCAATAATGTCTATAAAAATGATGGGGTTAGAAAACAGGTATTAATG<br/>           ATTGAAAATAGTATATGAAAAGTAATAAGAAAATTTTCAAGGAGAATTAATATTCAAAATATAATTGGT<br/>           GCATTCAATAGTAGTATTAATTTGTTTGGACCAGCATTATAGTATGCAGTAGCATGGTTTTATATTTTAT<br/>           GGATTACTGTCTATTGGTGAAATAGTTGCTTTTCAAACAATATCATCAATTTTTTTTTGGAATTGCAAATAAT<br/>           ATATGTACTGCATATTCTCAGTTTATTCTTGCTTCTTCATATTTAGAAAGAGTAGATGAAATTTGGTCTACT<br/>           GAAGAAGAAAATTATAATGAAAATGGTATAGCAAAGATATTAAGGAGATATTGAAGTCAATGATATAAC<br/>           TTTTCAGATATTCTAAAACCTCTCCATATGTAATTGAGAAGATTAACCTAAAATTAAGCTGGTTCAAATG<br/>           TAGCAGTTGTGGGACCTTCTGGTTCAGGAAAAAGCACACTAGGAAAAATTTAAGTGGTCTATATGATATT<br/>           GAAAGTGGAGATATTAATTATGATGGTATCAGCATCAGAGAATATAATAAAAATGAATTGTGTAATAATGAT<br/>           AGGCATTGTACCTCAGGAAGTAATGCTTTTAAATAAATCAATTTATCACAATATTGTAATGAATAATGGAA<br/>           GTATACCGCTTAATGAAGTAAGAGAAATATGTAATTGGTATGTATTGATGAAGAAATAATGAGTATGCCA<br/>           ATGCAATATAACTATAATATCAGAAATGGGATTGAATTTATCTGGTGGACAAAGGCAAAGGATACTGTT<br/>           GGCACGAATCCTCATCAGTAAACCTAAAATTTCTAATTTTAGATGAAGCTACAAGCTCGATAGATACTATAAG<br/>           TGAAGAAAAAATATCAAGGTATCTAGCTGATTTAGGATGCACTAGAATTACAATTGCACACCGCTTATCAAC<br/>           AATTATAAATGCAGATTGCATCTATGTAATGAATAAGGGAAGAATTATCGAGTCGGGAACGCATAATGAAT<br/>           TAATAGAGAATGGTAAGGTATATAATGAGTTGTACTATTCTGAAAACACAGATTA</p> |
| <p><b>&gt; <i>CloPt1</i></b><br/>           MKLFGIDITEIFSLFRKEKYVMKKVDIVKQISQTECGVCCVMIQNYNVNTSLGQVRKELDVGRDGMMSIQI<br/>           YEYLTSKGFSCPKPFTNNVLKLSEITLPCIAFFGENHFVVVESIKNQKIVVCNPSIGRKVMSIQEFDKDFSGIILQ<br/>           VLPTDKVEKVSKKENPWHVVIKLLKENRLLLAVVLYMILAYAIYLGVPMFEQNLIDKIVVLSNLDTVYIFSLIL<br/>           GLLIGYAIISLLRGFKLLTLNINIANKMEIGTYNKLRLRPYKYFEVRNTGELLYSLICVSSVRELLATYIVNGVID<br/>           VGAVIIVSIYMFQKSWLLGIFALVLWILNVVFLFLMQPKLSGVVDEELVQRATAQSLQTEALGSIMSIKMMGLE<br/>           KQVLNDWKIVYEKVKIRKFSRRINIQNIIGAFNSSLNLFQPAFIVCSSMVLYFYGLLSIGEIVAFQTISSIFFGIANNIC<br/>           TAYSQFILASSYLERVDEIWSTEEENYNENGIKDIKGDIEVNDITFRYSKTSPTYVIEKINLKIKAGSNVAVVGPS<br/>           GSGKSTLGKILSGLYDIESGDINYDGISIREYNKNELCKMIGIVPQEVMLFNKSIYHNVMNNGSIPLNEVREICK<br/>           LVCIDEEIMSMQMNTIISEMGLNLSGGQRQRILLARILISKPKILILDEATSSIDTISEEKISRYLADLGCTRITI<br/>           AHRSLTIINADCIYVMNKGRIIESGTHNELIENGKVVNELYYSNTD</p>                                                                                                                                                                                                                                                                                                                                                                                                                                                                                                                                                                                                                                                                                                                                                                                                                                                                                                                                                                                                                                                                                                                                                                                                                                                                                                                                                                                                                                                                                                                                                                                                                                                                                                                                                                                                                                                                        |
| <p><b>&gt; <i>cloM1</i></b><br/>           ATGGAAGTTGTTTGGAACTACATTAATAAATCTTTTGAATTAAGGAAATAAATAAATTTGTTTCATAG<br/>           GACTAAAGAATATTTTGGAGAGTTTCTAGATATTTTATATATTTTTTATTACGAATTTGACAATGCAA<br/>           TAATCAGAAAATATGGTGATTTATTTGATCAATTTAATAGCATAATTCACAACAATTAGATATATTTTTTC</p>                                                                                                                                                                                                                                                                                                                                                                                                                                                                                                                                                                                                                                                                                                                                                                                                                                                                                                                                                                                                                                                                                                                                                                                                                                                                                                                                                                                                                                                                                                                                                                                                                                                                                                                                                                                                                                                                                                                                                                                                                                                                                                                                                                                                                                                                                                                                                                                                                                                                                                                              |



AAGGATATATTTTATATAAGCATAAGAGTGTTAATTGTTGAAATGAATATTATGAAAGATGAAAATAAGCT  
AGTTGGTGCAAATAGCCAAGAAAGATACTTGTATTATTCGGAACTTTTAACAAAAGAAGAATACATTGATT  
ACCTAATAAGCAAGTATCCGGTTTTAAATAGAATTTTATTGGAAAAGTGTAATAAATCAAATTAGACTAATT  
AATGAATGTTTTAAGTAATTATATACAAGATTTTGAACCGATGTGTGAAACTTTTGAAATTTTCAGCTCAAAG  
TAAAATTAAGCAAATAATTGTTACATCGGGGGACTCACATAATGGAGGTAAGAAGGTTATCTTATTAGAAC  
TTTCAGAAAACAAAATATTATATAAGCCTCATGATTTTTTCATCAGAAAAAATATTTAATGAAATACTAGAA  
TCCATAAATAAAGAACAGTGCATAAAGTATAAGTTAAAGACTATTAAGAATATTACTAGGGATAAATTATGC  
ATGGCAGGATTATATCAAAGCAATTGGATGTACGAAGATTCAAGAGGTGGAGGAATATTACTACAAGATTG  
GAGCATATTTGGCGGTATTGTATTCTTTGGGATGCGAGGATATTCACAAGGAAAAATATTATAGCTTCTGGTA  
ACAATCCATATCTAATTGATATGGAGACACTATCAAATTTGTCAGGCACCTTTAATAAATGATAAAGCTACAA  
TGCTAGAGCACTTTTTTTATGAGAATAGCCAATCAGTCTTCGGAACAATGCTTTTACCTACTAATTCAGCAG  
TGTCTATATTTGATTATGACATTGGAGGAATCTCTGGAGATGATAACATTGAAACATCAAATGGGAAGCT  
TTTGATATAAAAAATCAAGGAAGTATAAATTTACAATTTGTTAAGGAATCTAAGTTTATAACTGGTGGATG  
TGATAACATAGTAAAACCTAATGGTGAGGCTACTCGTGCTAGAGATTATTACAAGAATATTATAGAAGGAT  
TTTCTGATTGTTATAAAAATTTTATAAAAACTCCAAATAAAGTTGTAGATATATTAAGAGAGTGAAGTT  
ATAATACGACAGGTTTTAAGACCAACAGCAGTTTATAGTAAATTTTTAGAAAGCTTCTACTTATCCAACCTAT  
CTAACAAATGAAGAATCTTTTAGAGGTCTCTTTGCAAAGTTAGATAATTTGGAAGAGGTAAAAGAAAAGAA  
AAAAGCACAAATTGAAATAGATAGTTTATATGAGTTTGATATACCATATTTTTTATTCGGATTTAAATACAA  
CTAACATTTATTCAGTCAAAGGAAAAGTTGATAATTACATAAATTATTCTGTTATGGATGCTATAAGCGGA  
AAGGCTAGGAAGTTTTTCGAAAAGGATTTAAAGGTGCAAATATATTATATTAACCTTGCACTATCAACCCA  
ACCTAACACATCTGAGATGATTTATAAATAAATTTATTCAGTAAATCACAAAATTTAAGAATATTACAA  
TTAATCATATTGCTAAACAGATAGGAGATGTAATTGAAGAAAACTAATTTGGGATTATAGAAAACAAAGT  
TGCTTTTTTATGATTGATACGGTAGTAAAAGAAAAGAGAAAAACTGTAGCATGGATTCTAGTTTGTATGG  
TTCGGGTGGAGTAATTCTGTACTATCTATCGCTATACAAAGCTACTTGTGATTTGAAGTATAAACATATAGT  
CGAAGGATTAATTAATGGACATATAGGGTTACATTCAAAAAAATCCTTAGAGGAGGGGATAGGATTATTTT  
CAGGGTTAACTTCATTAGCATATATATACTATCAATGTTATAGGGTTTTAGGAAAGAAACAGTATTTAGAA  
GATGTCTTAGAAGTTCTAAAGGAAATAGAAGAAAATTTACATATGTGGGATGAGCTAGATTTATCAACAGG  
GTTATCAGGTGTTATCATATTTCTATCAGAACTTTATAAAACAGAAAATAATGAACAGTATCTATTAATTG  
CAAATGGCTTAGCTGATAAATTATATAAATTAGTGTTGAAAGCTAATTTAATATGTTAACAGGATTAGCA  
CATGGATATGCAGGAGTTGCTTGGGCTTTATATAGTATAGGGCATATAGTTAATAATGAGGATTATATTA  
TTGCGCTATGAAATGCATTGAAGAGGAAAATATGTATTATGATTCAGAAAAAACAACCTGGAAAGATAAAA  
GAAATGGTAGTTTCAGAAAGCTTCTATTGGTGTTATGGTGCTTTTGGGATAGGTATCGCAAGATTAAGATG  
TATGAAATAGCTCATAATGATATTTTATTAAGGATATTGAAAAATGCAGATATATATATATTAATTATAA  
TTTAATTAATAGTAAGTATAATCATTCTTTATGCCATGGGCTTACAGGAACTTATCAGCAATAAAGATGTT  
TAGTGATTTTTATAAGAATGACAATAAGTTAAAAAAGAAATATAAGGAAATGTTGGATATATTATTAATG  
ATGTTGTAATGGCAAAGTTATATGGGGTGATAAGGAGCTCATAGAAGATTATTCATTTATGATTGGTTTA  
TCGGGTATTGGGTATGAGTTATTAAGGCACGAAGCTACAACTCTGTAATATTTTAGCATTAGAAGTGTA  
A

**> CloM1**

MEKLFGNVYIKKSFKEIKIVHRTKEYFGFESRYLYIFYEFDNAIIRKYGDLFDQFNSIIQQQLDIFFKDIFYIS  
IRVLIVEMNIMKDENKLVGANSQERYLYSELLTKEYIDYLISKYPVLNRILLEKCKNQIRLINECLSNIYQDFE  
PMCETFEISAQSKIKQIIVTSGDSHNGGKVVILLESENKILYKPHDFSSEKIFNEILESINKEQCIKYKLTIKNIT  
RDNYAWQDYIKAIGCTKIQEVEEYKYIGAYLAVLYSLGCEDIHKENIIASGNNPYLIDMETLSNCQAPLINDKA  
TMLEHFFYENSQSVFGTMLLPTNSAVSIFDYDIGGISGDDNIETSKWEAFDIKNQGTDLNLFVKESKFITGGCD  
NIVKLNGEATRARDYYKNIIEGFSDCYKIFIKTPNKVVDILKESEVIIRQVLRPTAVYSKFLEASTYPTYLTNEES  
FRGLFAKLDNLEEVKEKKAQIEIDSLYEFDIPYFSDLNNTNIYSVKGVKVDNYINYSVMDAISGKARKFSEKDL  
KVQIYYINLALSTQPNTSEMIYKYNLFSKSNLKNITINHIAKQIGDVIEEKLIWDYRQKQSCFFMIDTVVKEKRK  
YCSMDSSLYGSGGVILYLSLYKATCDLKYKHIVEGLINGHIGHLHSHKKSLEEGIGLFSGLTSLAYIYYQCYRVLGKK  
QYLEDVLEVLKEIEENLHMWDELDSLGLSGVIFLSELYKTENNEQYLLIANGGLADKLYKLVKANFNMLTGL  
AHGYAGVAWALYSIGHIVNNEYINCAMKCIIEENMYDSEKNNWKDKRNGSSESFYWCYGAFGIGIARLKM  
YEIAHNDILLKDIEKCRYIYINYNLINSKYNHSLCHGLTGNLSAIFMFSDFYKNDNKLKKEYKEMLDILLNDVV  
NGKVIWGDKELIEDYSFMIGLSGIGYELLRHEATNSVNILALEV

**>cloA1**

ATGCAAAATTATGAAAGCAAAGCAGGATTTATTTCTGAAATGGAAGTACTAGATGAATTAGTTTCAAACAAAAC  
TGTTGGTGGTGTACTACTGTACCTTGTGCAATTGCTATTATTGGAATTACACTTTCAGCTGGTATCTGCC  
AACTTCAGCATGCTCAAAGATTGTCCATGGAATAACTAA

**> CloA1 precursor peptide**

MQNYESKAGFISEMELDELVSNKTVGGATTVPICAIHIGITLSAGICPTSACSKDCPWNN

**> cloPt2**

ATGATCAAGAGAAGCGGTATACGAATAATTAACAATTAACAGAAACAGAATGTGGCTTATGTTGTTGTGC  
CATGATATTGAGATATTACGGAAGTAAGGAATCAATAAGAGAGTTACAAGATTATATGGATGTCGGCAGAG  
ATGGGATATCTATGTTTCAGATTAAGCATTCTTAAATGAAAAAGGTGTTTCTGCCAAAGTATATGAAGTC  
AATGAGATTGATAAGTTAGTTCATATAGATAAACCATTTATATGTTATTGGAATCAAAGCATTTCGTTAT  
TGTAGAAAAATAAAAAATAATATGTTTTATATAGCAGATCCAGCAGATGGGAAAGTAGTTCCTAATAGAG  
AAGAATTTTCTAAAAAATTTTCAAAAACCATTTTAGTAAGTGATGTTACGGAAGCATTAAACCTACGAAA  
AATAGAAATTACAATCCGTGGATAACTATTTTACAGTATCTTAAAGAAAATAAAAATATTAATCTTGAGAT  
TTTGATATTGCTTGGAAATAACTTATGGAATAACGTTGGAAATTCCTAATATTGTACAAAAATAATTGATA  
GGACAGGGACGGAAACTAATTCATCATTCTTGAATATTTTTCTTTTGATGCTAGGAGCATGTATAATTGCAT  
TTTTCTGAGTTACTTATTTAAAGGAATAAAAAATAATAGCCTTAAATGTGTTTTTAGGAAGAAAACCTGAA  
GCAAATACGTATAGACATCTCTTACAACCTCCATATAAGTTTTTTGAAACTAGATCAACTGGTGACTTGTTA  
TATCGTATTCAAGGTACCACCAGTATTAACAGATGTTGTCTACTCAGATTGTTGGAGGCGTAATTGATATT  
GGATCTGTTATTGCAATAATTTTTTATATGCAACAGAAGTCAGTGTGCTTACAATTTGTGCTTTTGCCTG  
TTCATGATAAATATTATAGTGATTTTAGTTATTCAACCTAAACTTACACAAGCTATTAATGGAGAGATTGTT  
GAACAGTCCAAATCTCAAACAGCTCAAATAGAATCATTATATTCAATATTTCAATAAAGATTTTCAGCTATG  
GAAGATTTGATCTATAAGAATTGGAGCAACATTTATGAGAGTGTGTTGAAATGTTTCAAAGAGGATGCT  
AATTTCAAATGCATATAGTGCTATTATGGCTGTACTTCAAACCTTTTACCGATTTTAATATTGTGTTTAGG  
AATTAATGAGTATTATAAGGGAAACATTACCATAGGCGAAGTAATTGCGTTTCAAGCTATTTCTTCAACATT  
TTTTAATTTGGGAATGTCAATAGTAAATGTATACCTCAATTTATTTCTGCATCACAATATTTAGATAGGAT  
AGCAGATATTTGGAACAGGGAAGCTGAATTAGAGGATGAAAATGCAATTGTTAGAGAAAATAAATGGTGATA  
TAGAGTTAGAGGATGTATGTTTTTCATATTTCAAAAAACTCAAAAAATGTACTTGAAAATATTTCAATGAAT  
ATTAAGAGGAACTAAAGTTGCAATTGTGGGGCTTCTGGATCAGGAAAAAGTTCACTAAGTAAAATTTT  
AGTTGGGTTGTACAAGCCTACAAAAGGGACAATAAGATTTGATGGAATTCCTATTGAAAATATGATAGGA  
AAGCTATCTGTAGGCAAATGGGAATCGTACCTCAGGATGCTATGTTATTTAATAAAAAGTATATATGAAAAT  
ATAGTAATGGGAAATTTCAATATAACATTAGAACAGGTAGAAGAAATTACAAAGATTGCATGCATACATGA  
TGAAATCAAAGCAATGCCATGGGATACCATAACAATAATATCTGAAATGGGTATGAATTTATCAGGAGGAC  
AGAGACAGAGAATTTATTAGCAAGATCAATGCTCTCGAATCCAAAGATTTTGGTGTAGATGAAGCAACT  
AGTAGCTTAGATAATTAATGAGAGAAAAATATCAAATATTTATCTGGTATTGGATGCACAAGAATTAT  
TATTGCGCATAGGTTGTCTACTATAGTTGATGCAGATGTTATATTCAATGAAAATGGACAAATTTGCAG  
AATATGGTAAGCATGAAGAGTTGATAAGTAAGAATGGTGAATATAAAAAATTATATTATATCGGTAGAGAT  
ATAGATAATTTGAATGTTGTATAA

**> CloPt2**

MIKRSIRIHKQLTETECGLCCAMILRYYGSKESIRELQDYMDVGRDGISMVFQIKHFLNEKGVSAKVYEVNEID  
KLVHIDKPFICYWNQKHFVIVEKIKNNMFYIADPADGKVVLNREEFSKKFSKTIKLVSDVTEAFKPTKNRNYNP  
WITILQYLKENKILILELILLGITYGITLEIPNIVQKIIDRTGTETNSSFLNIFLLMLGACIIAFFVSYLFKGIKIALN  
VFLGRKLEANTYRHLQLPYKFFETRSTGDLLYRIQGTTSIKQMLSTQIVGGVIDIGSVIAIFYMQQKSVLLTIC  
AFALFMINIIVILVIQPKLTQAINGEIVEQSKSQAQIESLYSIISIKISAMEDLIYKNWSNIYESVEMFQKRMLIS  
NAYSAIMAVLQNFSPILILCLGINEYYKGNITIGEVIQFQAISSFFNLGMSIVNVYPQFISASQYLDRIADIWNRE  
AELEDENAIVREINGDIELEDVCFYSYKNSKNVLENISMNIKRGTKVAIVGASGSGKSSLSKILVGLYKPTKGTIR  
FDGIPIEKYDRKAICRQMGIVPQDAMLFNKSİYENIVMGNFNITLQVEEITKACIHDEIKAMPMPGYHTIISEM  
GMNLSGGQRQRILLARSMLSNPKILVLDEATSSLDNINERKISNYLSGIGCTRIIIHRLSTIVDADVIFIMKNGQI  
AEYKHEELISKNGEYKLYYIGRDIDNLNVV

**> cloM2**

ATGGAAGATATGATAAGTTATTACGAAAAATGCTGGATGAAATTATATCCAGAAATGAAGAGTATAGAAGA  
GTTAAATACATATCTGAAAAAGTATTTGAAAGAGTCTTAAAGAAAAGTTGCAAATGAAAGAGTAGAAA

AAGTATCCGTA AAAAGAGTACAACAGAAATTTAAAAATGTTTTAGATGACAACATGCTAGAGAACATGAGA  
TTTAGTAGGTTTTATGGACCAATTATGGTCGAATATATAGAGAATTTACCTAAATATATTGAAAAACGAT  
GATAGTGAAAAATATTA AACTGTTTATGGAAAGTATGATTCTTCAGCTATCTGACTTAATGTGTAGTATAG  
CTTTTCGTACAATGGTTTTTGAATAAATAATGCGAAAAATAAAAAATCTACTTAAAGGAGAGAGTCTCGAA  
GAGAGATATAAATATTTTAATAATGAATTGTTGGATGACTATCAATACCGAAAAAGTTTATATAGTGAGTA  
TTGTTTTCTAGTTGAAACTTTAGATGAGTGTGCCAAAAATTTTGTGAAATACATTGAAGAAATACTTGTA  
ACACAAGTAAAAATATGTGTAGAATTCAAAGTGACGTTAATTCAAATATTGAATTAGGTAAACTCATAAAT  
ATTGAATTTGCTTTGGGAGATACTCATTGTAGAGGAAAAAGTGTAGCAAAACTGATTTTTGAAAATACAAT  
AATTTATTATAAGCCTAGAAATAGTATAATTGATAACAAATTC CAATCAGTGCTTAATTTAATAAACGAAA  
AAGGTAACTTTCTGGTAGGAAATACAGAGTTATGAATATTCATGGAACAAGTGAATGTGGTTGGTTTGA  
AATATTAAGTATGAAGAATGTAGAAGTATAGATAATGTTTCATGATTATTATTTAAAGATAGGCGGCTTAAT  
TGGCATTTTGTATTTCTTTAATGCAACAGATTTTCATCATGAAAATATTATAGCTTGTGCTGAAAATCCTAT  
GTTAATAGATTTAGAATCAATATTTAGTGTAGAGATGAAAAGTAAAGTTTTTGTGAAAATAGTGCTTATA  
ATAATGCAATTGAATATTTAAAATCAAGTGTACAATCGATTGGAATATTACCTAATAAGTTACATATTGGT  
GATTTAGATGACAAGTATGAAACAGGAGGTATTGTTTATAAAGAAAAACAAGTTGCACCAATAAAATCTTT  
AAAAGTTGTTAATGATGCATCTGATGGTATCCGTACGGAAGTAAATTTCTATTATTGAAGGAAATCTTA  
ATGCACCTAAATATAATGGCAATATTATAAACCTAAAGAGTATGTTGAAGATATTAAGGAGGGATTTAGG  
TTAGTTTATAAATGGATTCTAGGCAACAAGAAAGATTTATTGAATTTGTTGAAACGTCATTTAGTGAAAC  
AAAAATAAGGATTATATTGAAGCCACATTTATGTATGCACAAATAAATTCAATAGCAAAACATCCTAATT  
TTATGAGTAGCGAAGATGAGAATGAACTTATAAATGCAAGAATAGGTATATACGCAGATAATATCGATATT  
ATTAATCAGAAATAAGATCTTTAAAAAGATATGAGATACCTTATTTTTTCAGCGTTATTTAACGAAGAAAA  
ATTATTTGATGAAGATGAAAATGTATTAGAATCAAGATTAATTATTAGTCCCAACTTTTATTTAGAAACA  
AAGTATGTAAAGCTACTGAAATAGATTTGAATAATCAAATAGATTTTATAAGTATTTTCAATTTTAAGTAAA  
AATCCAGAAGAGCTTAGAACTGGAATTCATTATGTTGAAGATGCAGTTGAAATCATCAATACTGACAGTTA  
TCTAAATGTTGCAAAAAGAAATTTGGTGATTATTTATATAGCATAGCAATTATCGGTGAAAATCAGCATGGCA  
AAAGTGATGCAACATGGATTGGAAGTGCTGTTTCAAAAATAGATGTTAATGATTGGACTTATAGTGTTTCA  
GATTTAGATTTATATAATGGAAATAGTGGTATAGCATTATTTCTATTAATTTATGGAAAGTTACAAAGGA  
TAAAAAATATCTTGATTTAGCAATACAGGCAGCAGA ACTTATTATAAGCATAATTA AAAATAAGACATTTA  
ATCATTCTACTCTTATAGGAGGGTTTAAATGGTATCGGCTCTTATATTTACATAATTAGTAAATTAGTGGTGA  
ATACCAATGATGAATATTTTTATAGTACGTTAATAGAATCTATTGACTTATTAGAAGAAAGAATTGAAGCC  
GCTTCAGAAATGGATTTAGTGGCTGGAGCAAGTGAATGCTTGCAGTTTTATTGAATGTATATAGTGAAAT  
TGATGATAAATTAATTAAGAAAAAGTAAACCCTTCTATATATGTTATTTTACAAGATCCAAGAGAATG  
TCAAAAGCGGTGGGAACTAATTAGATATTCTGGTTTTGGACATGGAATTGCAGGGTGTATTCCATACTTGT  
ACAAGTTGATTTAATAGATGAAAATAGAGAAGTCTATCAGTTATTTAGTGAGTTATTGTCATATGAACGC  
GATCATTTCTATAGTAAGGAAGAAAAGGATTGGGTTATGTCTGATGATGAGGTCAATTATTCAAAAGCATG  
GTGTCATGGTGCACCAGGAATTACTCGAAAAGATTATTCTAAAGGAATTAGGTTACGAGGATGAGTATT  
TGGATCAAGAGATCAAAGTGGCTTTAATAATATTAAGAAAAAATGTATTGGTAATAATATAGTGTATTGT  
CATGGAGATATAGGAACTTAGATATTATACAATATGCAGCAAAGATCAGCAAAGATGAAAAAATGATTAA  
GGAATGTAGTAACACATATGATAAGTTATTTCAACTACATATAAAAAATAACTGGAATAGTGAAGCGTCTG  
CATATAGTAAGTGTAAAGGATAATGGTTGGAGTATCTGGTATTGGGCTATCATTACTGAGGATGATAAAT  
AAGTATGATATAGATGATTTTCTTTGGCTAAGTTAA

**> CloM2**

MEDMISYYEK CWMKLYPEMKSIEELNTYLKVKFGLKSLKEKLQNERVEKVSVKEYNRNLKMFLLDDNMLENM  
RFSRFYGPIMVEYIENLPKYIEKTMIVKNIKLFMESMILQLS DLMCSIAFRMTMVFEINNAKKNLLKGESPEERY  
KYFNNE LLDDYQYRKSLYSEYCFVETLDECAKNFVKYIEEILVNTSKNMCRIQSDVNSNIELGKLINIEFALGD  
THCRGKSVAKLIFENTIIYYKPRNSIIDNKFQSVLNLIN EKGILSGRKYRVMNIHGTSECGWFENIKYEECRSIDN  
VHDYYLKIGGLIGILYFFNATDFHHENIIACAENPMLIDLESIFSVEMKSKVFDENSAYNNAIEYLKSSVQSIGILP  
NKLHIGDLDDKYETGGIVYKEKQVAPIKSLKVVNDASD GIRTELVNSIIEGNLNAPKYNGNIINPKEYVEDIKEG  
FRLVYKWILGNKKEFIEFVETSFSETKIRIILKPTFMYAQINSIAKHPNFM SSEDENELINARIGIYADNIDIKSEI  
RSLKRYEIPYFSA LFNEEKLFDEDENVLESRLIISPQLLFRNKVCKATEIDLNNQIDFISISFLSKNPEELRTGIHY  
VEDAVEIINTDSYLVNAKEIGDYLSIAIIGENQH GKSDATWIGSAVSKIDVNDWTYSVSDLDLYNGNSGIALFL  
LNLWKVTKDKKYLDLAIQA AELIISIKNKTFNHSTLIGGFNGIGSYIYIISKLVVNTNDEYFYSTLIESIDLLEERI

|                                                                                                                                                                                                                                                                        |
|------------------------------------------------------------------------------------------------------------------------------------------------------------------------------------------------------------------------------------------------------------------------|
| EAASEMDLVAGASGMLAVLLNVYSEIDDKLIKEKVKPLLYMLFYKIQENVKSGGKLIRYSGFGHGIAGCIPYLYK<br>LYLIDENREVVYQLFSELLSYERDHFYSKEEKDWVMSDDEVNYSKAWCHGAPGILLEKIILKELGYEDEYLDQEI<br>KVALNNIKKKCIGNNIVYCHGDIGNLDIIQYAAKISKDEKMIKESNTYDKLFLQHLIKNNWNSEASAYSKCKGI<br>MVGVSIGLSLLRMINKYDIDDFLWLS |
| > <i>cloA2</i><br>ATGAAGAATTATGAAGAATTATTTAATGAAGTTAATGAAAATGCTTCATTACAAGCAGAATTAACGGTGG<br>TAGTATTGCAACTACTATAGTTTGCACAATTGCACAATCTCTTTTAGGTTGTGTTGGTAGCTATGTTCTTGG<br>AAACAAGGGATATGGTTGTACAGTTACAAATGAATGTATGAGTAACTGTAGATAA                                        |
| > <b>CloA2 precursor peptide</b><br>MKNYEELFNEVNENASLQAE LN GGS IATTIVCTIAQSL LGCVGSYVLGNKGYGCTVTNECMSNCR                                                                                                                                                              |

**Table S2.** Precursor peptides within the clostridial clade, selected based on the criteria: the BGCs contained all the essential genes (the precursor and the biosynthetic enzyme), the precursors contained residues that could be recognized by the peptidase (GG or GA), and formed heterocycles specific for lanthipeptides (the amino acid sequence contained serine, threonine, and cysteine), and they all belonged to the same transcriptional unit. The table includes molecular weight (Mw), isoelectric point (IP), and grand average of hydropathicity (Gravy) values. These values were computed using the ProtParam tool for the core peptide, excluding any post-translational modifications. Additionally, in pink the characteristic cleavage sites of the C39 peptidase, presence of serine (S), threonine (T), and cysteine (C), and the predicted cycles by RiPPMiner.

| Bacteria                                              | BGC Internal Code | Lanthipeptides                                                                                                   | MW (Da) | IP   | GRAV Y | S+T | C | Cycles |
|-------------------------------------------------------|-------------------|------------------------------------------------------------------------------------------------------------------|---------|------|--------|-----|---|--------|
| <i>Blautia wexlerae</i><br>DSM 19850                  | AXVN01000112      | MKKNYRNPMTRPENFMN<br>PAGNVMKEIKEADLNFS<br>AGAG EPRVSDGSQFCTST<br>KECNWGTIMFVCC                                   | 3086.49 | 4.68 | -0.132 | 6   | 4 | 3      |
| <i>Caldicellulosi raptor bescii</i><br>DSM 6725       | NC_012034         | MKESTIKNPVLNRKVNAKI<br>YNPAGDIVKEIQEQLPEQ<br>AGGGTPTVVVGVISAVTA<br>VTNLAFSIDQAITKYYACSL<br>VYTSAECRSDGRSCRM<br>R | 5696.53 | 8.61 | 0.323  | 12  | 3 | 2      |
| <i>Caldicellulosi raptor kristjanssonii</i><br>177R1B | NC_014721         | MVETYKKNLYGITFEELEE<br>GEMQELVGGGPEITTVIES<br>IKAATAFSTLTCVGSAAAS<br>LIATVITYIVTK                                | 4226.98 | 6.13 | 1.107  | 12  | 1 | 1      |
|                                                       |                   | MNSTIESRIGICFEQLNEE<br>EMLEAMGGNPWLGTPPT<br>AALSTTVACGVVTGLVSA<br>AVSVTVVITKKL                                   | 3884.59 | 9.31 | 0.995  | 11  | 1 | 1      |
| <i>Caldicellulosi raptor lactoaceticus</i><br>6A      | NZ_AEKD0100002    | MNSTIESRIGICFEQLNEE<br>EMLEAMGGNPWLGTPPT<br>AALSTTFVCGVVSGLVSA<br>AVSVTVVITKKL                                   | 3946.66 | 9.31 | 1.018  | 11  | 1 | 1      |
| <i>Caldicellulosi raptor sp.</i><br>Rt8.B8            | LACO0100001-R3    | MVETYKKNLYGITFEELEE<br>GEMQELVGGGPEITTVIES<br>IKAATAFSTLTCVGSAAAS<br>LIATVITYIVTK                                | 4226.98 | 6.13 | 1.107  | 12  | 1 | 1      |
|                                                       |                   | MNSTIESRIGICFEQLNEE<br>EMLEAMGGNPWLGTPPT<br>AALSTTVACGVVTGLVSA<br>AVSVTVVITKKL                                   | 3884.59 | 9.31 | 0.995  | 11  | 1 | 1      |

|                                                                            |                          |                                                                                                                            |             |          |        |    |   |   |
|----------------------------------------------------------------------------|--------------------------|----------------------------------------------------------------------------------------------------------------------------|-------------|----------|--------|----|---|---|
|                                                                            | LACO010<br>00001-R5      | MKESTIIKNPVLRNKVN<br>AKI<br>YNPAGDIVKEIQEQNLPEQ<br>A<br>GGGTPTVVVGVISAVTA<br>VTNLAFSIDQAITKYACSL<br>VYTYSAECRSDGRSCRM<br>R | 5696.5<br>3 | 8.6<br>1 | 0.323  | 12 | 3 | 2 |
| <i>Clostridium cellulovorans</i><br>743B                                   | NC_01439<br>3 -R6        | MANYKIGAI FEQKNYEEMA<br>SSQMT<br>GGDGFVTVTSPQ<br>YTLSCCITWTIPSIKLTV                                                        | 3131.6<br>5 | 5.8<br>2 | 0.614  | 9  | 2 | 2 |
| <i>Clostridium cellulovorans</i><br>743B                                   | NC_01439<br>3 -R18       | MQNYESKAGFISEMELDE<br>LVSNKTV<br>GGATTVP<br>CAIAII<br>GITLSAGICPTSACSKDCP<br>WNN                                           | 3349.9<br>0 | 5.8<br>1 | 0.676  | 7  | 4 | 4 |
|                                                                            |                          | MKNYEELFNEVNENASLQ<br>AELN<br>GGSIATTIVCTIAQSL<br>LGCVGSYVLGNKGYGCTV<br>TNECMSNCR                                          | 4288.9<br>7 | 7.8<br>2 | 0.526  | 9  | 5 | 5 |
| <i>Clostridium scindens</i><br>ATCC 35704                                  | NZ_DS49<br>9711 - R1     | LDIPAMDLMGMLL<br>GGCH<br>SSATPFLSASSECLATFSN<br>LEMQHSP<br>IPVCNFR                                                         | 3870.3<br>6 | 6.0<br>0 | 0.075  | 9  | 3 | 3 |
| <i>Clostridium</i><br>sp. BL8                                              | AUPA010<br>00006 -<br>R1 | MADYQKVTFGVSVQEELE<br>E<br>VTEVDN<br>GAI<br>AWVSVLATA<br>AFTVKLASAVVCETGACT<br>GYCN                                        | 3291.8<br>4 | 6.0<br>2 | 1.197  | 6  | 3 | 3 |
|                                                                            |                          | MKKYNDITGFVSVVEELEEV<br>SNEAQ<br>GGIALSAITFVTGT<br>VIWIATRAVCETGACTSYC<br>K                                                | 3408.0<br>1 | 7.9<br>5 | 0.988  | 8  | 3 | 3 |
|                                                                            |                          | MQNNYNLSTGFVSIEELE<br>E<br>ASNDIGVA<br>GAF<br>TTIACAAIG<br>LSIAILTVAACPTESGACTG<br>YCR                                     | 3320.9<br>0 | 6.0<br>1 | 1.171  | 7  | 4 | 4 |
|                                                                            |                          | MKNIEMLNKPNVLRKYSV<br>NEINPAGDLLTEVTEQDFT<br>ISVS<br>GGYDSAKLGNQGS<br>D<br>CSWSRECQRICNWISYGS<br>GGWFGC                    | 4079.4<br>4 | 6.0<br>9 | -0.619 | 6  | 4 | 3 |
| <i>Clostridium</i><br>sp. KNHs209                                          | JPNB0100<br>0003 - R2    | MRNDILNLTNPMEKELE<br>E<br>QIL<br>GGG<br>NGVIKTISHECAM<br>NTWQFLFTCCS                                                       | 2791.2<br>2 | 6.7<br>2 | 0.292  | 5  | 3 | 3 |
| <i>Dorea</i> sp. 5-<br>2                                                   | ASTD010<br>00045 -<br>R1 | MQQNSNLDYAGDLSVELG<br>EIEKLIPKEEQVE<br>GASTSTL<br>MCGTYFTLIC                                                               | 1815.1<br>6 | 5.5<br>4 | 1.176  | 6  | 3 | 3 |
| <i>Eubacterium plexicaudatum</i><br>ASF492                                 | AQFT010<br>00101 -<br>R1 | MRDENKKTNEVSGEAFED<br>LTISEMAEVQ<br>GAGDMEGE<br>LTPVCVVIATASASVGLA<br>KTFKGC                                               | 3255.8<br>1 | 6.2<br>1 | 0.539  | 6  | 2 | 2 |
| <i>Lachnospira</i><br><i>ceae</i><br><i>bacterium</i><br>2_1_58FAA         | ACTO010<br>00067 -<br>R1 | MIDASILLYPIY<br>GGVLMRSK<br>RIPAEQYRLIMECRQSG<br>L<br>TDHQWCVEHDIKPGTFYN<br>WVKRLRQKGCVDLPAST<br>G                         | 7233.3<br>5 | 8.9<br>9 | -0.640 | 6  | 3 | 2 |
| <i>Lachnospira</i><br><i>ceae</i><br><i>bacterium</i><br>3_1_57FAA_<br>CT1 | ACTP010<br>00039 -<br>R1 | LSGTKNRA<br>GASKRRLTLCI<br>RILYEMNGEKISGCSS                                                                                | 2929.4<br>6 | 9.3<br>9 | -0.162 | 5  | 2 | 2 |

|                         |                          |                                                                                                 |             |          |        |   |   |   |
|-------------------------|--------------------------|-------------------------------------------------------------------------------------------------|-------------|----------|--------|---|---|---|
| <i>Roseburia faecis</i> | CYXV010<br>00003 -<br>R1 | MEIKSILIKDTRREERIRIVQ<br>EGLNQC <b>GA</b> CDFCNGCD<br>NLGGGSVDAFYEPYINGE<br>KELREINEEYRSNSGLVK  | 5034.4<br>5 | 4.2<br>5 | -0.674 | 3 | 3 | 1 |
|                         |                          | MKDLRNPLTRTENFEHPS<br>GNIMKELTEAELNSVAA <b>GA</b><br><b>G</b> VARNSSGGIACTLTGECNI<br>GTHIKFCCYD | 3075.5<br>0 | 6.7<br>5 | 0.263  | 4 | 4 | 3 |

**Table S3.** RMSD values resulting from the structural alignments between PCAT1 and the CloA1 and CloA2 mature peptides proteins models predicted by AlphaFold.

| PCAT1            | CloA1<br>pLDDT=83.9 | CloA2<br>pLDDT=84.8 |
|------------------|---------------------|---------------------|
| Protein domains  | RMSD (Å)            | RMSD (Å)            |
| Complete protein | 3.211               | 2.924               |
| C39 peptidase    | 0.982               | 0.86                |
| ABC membrane     | 3.25                | 2.962               |
| ABC transport    | 1.159               | 1.204               |

**Table S4.** RMSD values resulting from the structural alignments between CyIM and the CloM1 and CloM2 protein models predicted by AlphaFold.

| CyIM             | CloM1<br>pLDDT=87.9 | CloM2<br>pLDDT=88.8 |
|------------------|---------------------|---------------------|
| Domain           | RMSD (Å)            | RMSD (Å)            |
| Complete protein | 4.652               | 6.261               |
| Dehydratase      | 1.607               | 1.507               |
| N-Lobe           | 1.186               | 1.244               |
| C-Lobe           | 1.733               | 2.145               |
| KA               | 0.568               | 0.901               |
| Ka11             | 0.96                | 0.602               |
| Cyclase          | 4.888               | 3.532*              |

**Table S5.** Resistance profile of all the strains used in antimicrobial assays.

| Antibiotic/<br>Bacteria | <i>S. aureus</i><br>ATCC<br>43300 | <i>S. epidermidis</i><br>MIQ43 | <i>P. aeruginosa</i><br>ATCC PA14 | <i>P. aeruginosa</i><br>MIQPA25 | <i>E. coli</i><br>K12<br>IM08B | <i>A. baumannii</i><br>747 |
|-------------------------|-----------------------------------|--------------------------------|-----------------------------------|---------------------------------|--------------------------------|----------------------------|
| Cephalothin             | R                                 | -                              | R                                 | -                               | -                              | -                          |
| Cefazolin               | R                                 | -                              | R                                 | -                               | -                              | -                          |
| Cefotaxime              | R                                 | -                              | S                                 | R                               | -                              | S                          |
| Aztreonam               | R                                 | -                              | S                                 | R                               | -                              | -                          |
| Penicillin G            | R                                 | R                              | R                                 | -                               | -                              | I                          |
| Oxacillin               | R                                 | R                              | R                                 | -                               | -                              | -                          |
| Ampicillin              | M                                 | R                              | R                                 | -                               | -                              | R                          |
| Ticarcillin             | M                                 | -                              | S                                 | -                               | -                              | -                          |

|               |   |   |   |   |   |   |
|---------------|---|---|---|---|---|---|
| Mezlocillin   | M | - | S | - | - | - |
| Imipenem      | S | - | - | S | - | S |
| Clindamycin   | - | R | - | - | - | - |
| Erythromycin  | R | R | - | - | - | - |
| TMT-SFM       | R | R | - | - | - | - |
| Rifampicin    | - | S | - | - | - | - |
| Vancomycin    | S | S | - | - | - | S |
| Linezolid     | - | S | - | - | - | - |
| Minocycline   | - | S | - | - | - | - |
| Carbenicillin | - | - | - | R | - | - |
| Piperacillin  | - | - | - | R | - | I |
| Ceftriaxone   | - | - | - | R | - | - |
| Ceftazidime   | - | - | - | M | - | R |
| Levofloxacin  | - | - | - | M | - | S |
| Ofloxacin     | - | - | - | M | - | S |
| Meropenem     | - | - | - | S | - | S |
| Amikacin      | - | - | - | S | - | S |
| Gentamicin    | - | - | - | S | - | - |
| Ciprofloxacin | - | - | - | S | - | S |
| Norfloxacin   | - | - | - | S | - | - |
| Colistin      | - | - | - | S | - | S |
| Polymyxin     | - | - | - | S | - | - |
| Streptomycin  | - | - | - | - | R | - |

**Table S6.** Ions detected from the MS spectrum of cellulysin harboring 6 net dehydrations.

|                                                                                                                                                                                                                              |                      |                      |                      |               |
|------------------------------------------------------------------------------------------------------------------------------------------------------------------------------------------------------------------------------|----------------------|----------------------|----------------------|---------------|
| <b>Amino acid Sequence</b><br>GSSHHHHHSQDPNSSS<br>ARLQKNYEELFNEVNE<br>NASLQAELNGGSIATTI<br>VCTIAQSLGCVGSYVL<br>GNKGYGCTVTNECMSN<br>CRC<br>C <sub>383</sub> H <sub>601</sub> N <sub>119</sub> O <sub>133</sub> S <sub>7</sub> | <b>Average mass</b>  | 9225.0425            | <b>Isotopic Mass</b> | 9219.1968     |
| <b>Ions</b>                                                                                                                                                                                                                  | <b>Expected mass</b> | <b>Measured mass</b> | <b>Error (ppm)</b>   | <b>Charge</b> |
| <b>M-6H<sub>2</sub>O</b>                                                                                                                                                                                                     | 9116.9508            | -                    | -                    |               |
| <b>[M-6H<sub>2</sub>O+7H]<sup>7+</sup></b>                                                                                                                                                                                   | 1303.4215            | 1303.42834           | 6.84                 | +7            |

|                                          |           |            |       |     |
|------------------------------------------|-----------|------------|-------|-----|
| [M-6H <sub>2</sub> O+8H] <sup>9+</sup>   | 1140.6189 | 1140.62655 | 7.65  | +8  |
| [M-6H <sub>2</sub> O+9H] <sup>9+</sup>   | 1013.9945 | 1014.00425 | 9.75  | +9  |
| [M-6H <sub>2</sub> O+10H] <sup>10+</sup> | 912.6951  | 912.70222  | 7.12  | +10 |
| [M-6H <sub>2</sub> O+11H] <sup>11+</sup> | 829.8137  | 829.8293   | 15.6  | +11 |
| [M-5H <sub>2</sub> O+11H] <sup>8+</sup>  | 1142.8689 | 1142.87899 | 10.09 | +8  |

**Table S7.** Ions detected from the MS spectrum of the cellulysin tryptic fragment.

|                                                                                                                                                                                                 |                      |                      |                      |               |
|-------------------------------------------------------------------------------------------------------------------------------------------------------------------------------------------------|----------------------|----------------------|----------------------|---------------|
| <b>Amino acid Sequence</b><br>NYEELFNEVNENASLQ<br>AELNGGSIATTIVCTIAQ<br>SLLGCVGSYVLGNKGY<br>GCTVTNECMSNCRC<br>C <sub>283</sub> H <sub>452</sub> N <sub>78</sub> O <sub>100</sub> S <sub>7</sub> | <b>Average mass</b>  | 6771.5345            | <b>Isotopic Mass</b> | 6767.0726     |
| <b>Ions</b>                                                                                                                                                                                     | <b>Expected mass</b> | <b>Measured mass</b> | <b>Error (ppm)</b>   | <b>Charge</b> |
| <b>M-6H<sub>2</sub>O</b>                                                                                                                                                                        | 6663.4429            |                      |                      |               |
| [M-6H <sub>2</sub> O+3H] <sup>3+</sup>                                                                                                                                                          | 2222.1476            | 2222.1512            | 3.6                  | +3            |
| [M-6H <sub>2</sub> O+4H] <sup>4+</sup>                                                                                                                                                          | 1666.8607            | 1666.85197           | -8.73                | +4            |
| [M-6H <sub>2</sub> O+5H] <sup>5+</sup>                                                                                                                                                          | 1333.6886            | 1333.68256           | -6.04                | +5            |
| [M-5H <sub>2</sub> O+5H] <sup>5+</sup>                                                                                                                                                          | 1337.2886            | 1337.30433           | 15.73                | +5            |



**Table S8.** Ions detected from the MS spectrum of cellulysin after an iodoacetamide alkylation tryptic fragment.

|                                                                                                                                                                                                 |                      |                      |                      |               |
|-------------------------------------------------------------------------------------------------------------------------------------------------------------------------------------------------|----------------------|----------------------|----------------------|---------------|
| <b>Amino acid Sequence</b><br>NYEELFNEVNENASLQ<br>AELNGGSIATTIVCTIAQ<br>SLLGCVGSYVLGNKGY<br>GCTVTNECMSNCRC<br>C <sub>283</sub> H <sub>452</sub> N <sub>78</sub> O <sub>100</sub> S <sub>7</sub> | <b>Average mass</b>  | 6771.5345            | <b>Isotopic Mass</b> | 6767.0726     |
| <b>Ions</b>                                                                                                                                                                                     | <b>Expected mass</b> | <b>Measured mass</b> | <b>Error (ppm)</b>   | <b>Charge</b> |
| [M-6H <sub>2</sub> O+IAA+5H] <sup>5+</sup>                                                                                                                                                      | 6720.4429            |                      |                      |               |
| [M-6H <sub>2</sub> O+IAA+3H] <sup>3+</sup>                                                                                                                                                      | 2241.1476            | 2241.15814           | 10.54                | +3            |
| [M-6H <sub>2</sub> O+IAA+4H] <sup>4+</sup>                                                                                                                                                      | 1681.1107            | 1681.12413           | 13.43                | +4            |
| [M-6H <sub>2</sub> O+IAA+5H] <sup>5+</sup>                                                                                                                                                      | 1345.0886            | 1345.09924           | 10.64                | +5            |

**Table S9.** Ions detected from the MS spectrum of cellulysin without any dehydration.

|                                                                                                                                                                                                                      |                      |                      |                      |               |
|----------------------------------------------------------------------------------------------------------------------------------------------------------------------------------------------------------------------|----------------------|----------------------|----------------------|---------------|
| <b>Amino acid Sequence</b><br>GSSHHHHHHSQDPNSSS<br>ARLQQNYESKAGFISEM<br>ELDELVSNTVGGATT<br>VPCAIAIIGITLSAGICPT<br>SACSKDCPWNNC<br>C <sub>360</sub> H <sub>564</sub> N <sub>108</sub> O <sub>122</sub> S <sub>6</sub> | <b>Average mass</b>  | 8549.3705            | <b>Isotopic Mass</b> | 8543.9573     |
| <b>Ions</b>                                                                                                                                                                                                          | <b>Expected mass</b> | <b>Measured mass</b> | <b>Error (ppm)</b>   | <b>Charge</b> |
| <b>M</b>                                                                                                                                                                                                             | 8543.9573            |                      |                      |               |
| [M+6H] <sup>6+</sup>                                                                                                                                                                                                 | 1425.8951            | 1425.8951            | -5.431               | +6            |

|                              |           |           |        |     |
|------------------------------|-----------|-----------|--------|-----|
| <b>[M+7H]<sup>7+</sup></b>   | 1222.3386 | 1222.3386 | -4.816 | +7  |
| <b>[M+8H]<sup>9+</sup></b>   | 1069.6713 | 1069.6713 | -4.063 | +8  |
| <b>[M+9H]<sup>9+</sup></b>   | 950.9301  | 950.9301  | -3.792 | +9  |
| <b>[M+10H]<sup>10+</sup></b> | 855.9371  | 855.9371  | -3.02  | +10 |

**Table S10.** Fragment ions detected from the MS/MS of the tryptic fragment from N24 to C-terminal of the clostrisin harboring 6 net dehydrations.

| Ions | Expected mass | Measured mass | Error (ppm) | Charge |
|------|---------------|---------------|-------------|--------|
| b12  | 462.1928      | 461.9928      | 0.2         | 3      |
| b19  | 1042.4505     | 1046.2505     | -3.8        | 2      |
| b31  | 866.4009      | 866.8009      | -0.4        | 4      |
| b38  | 1432.6359     | 1432.4359     | 0.2         | 3      |
| b40  | 902.415       | 891.215       | 11.2        | 5      |
| b40  | 1127.7669     | 1132.5669     | -4.8        | 4      |
| b41  | 1149.5249     | 1143.4249     | 6.1         | 4      |
| b42  | 1178.0356     | 1161.2356     | 16.8        | 4      |
| b45  | 1260.0884     | 1276.9884     | -16.9       | 4      |
| b47  | 1031.0808     | 1035.6808     | -4.6        | 5      |
| b48  | 1045.2882     | 1051.4882     | -6.2        | 5      |
| b48  | 1306.3584     | 1293.6584     | 12.7        | 4      |
| b49  | 1065.4977     | 1065.9977     | -0.5        | 5      |
| b55  | 985.4658      | 983.1658      | 2.3         | 6      |
| y14  | 763.2971      | 769.8971      | -6.6        | 2      |
| y14  | 1525.5868     | 1525.0868     | 0.5         | 1      |
| y15  | 814.8017      | 813.9017      | 0.9         | 2      |
| y15  | 1628.596      | 1641.596      | -13         | 1      |
| y17  | 899.8544      | 902.8544      | -3          | 2      |
| y17  | 1798.7016     | 1796.6016     | 2.1         | 1      |
| y18  | 935.373       | 936.573       | -1.2        | 2      |
| y19  | 978.889       | 972.689       | 6.2         | 2      |
| y20  | 1035.431      | 1039.931      | -4.5        | 2      |
| y23  | 1171.0076     | 1174.8076     | -3.8        | 2      |
| y3   | 350.1129      | 357.5129      | -7.4        | 1      |
| y30  | 1511.7018     | 1525.5018     | -13.8       | 2      |
| y5   | 633.245       | 634.245       | -1          | 1      |
| y8   | 979.376       | 965.276       | 14.1        | 1      |

**Table S11.** Fragment ions detected from the MS/MS spectrum of the tryptic fragment from N24 to C-terminal of the clostrisin harboring 6 net dehydrations and 1 alkylation.

| Ions            | Expected mass | Measured mass | Error (ppm) | Charge | Modification(s)                          |
|-----------------|---------------|---------------|-------------|--------|------------------------------------------|
| b <sub>2</sub>  | 278.1135      | 278.1212      | 7.7         | +1     |                                          |
| b <sub>3</sub>  | 407.1561      | 407.1621      | 6.0         | +1     |                                          |
| b <sub>4</sub>  | 536.1987      | 536.2047      | 6.0         | +1     |                                          |
| b <sub>5</sub>  | 649.2828      | 649.2868      | 4.0         | +1     |                                          |
| b <sub>6</sub>  | 796.3512      | 796.3528      | 1.6         | +1     |                                          |
| b <sub>8</sub>  | 1039.4367     | 1039.4527     | 16.0        | +1     |                                          |
| y <sub>38</sub> | 1955.3676     | 1955.3575     | -10.1       | +2     | 6 dehydrations<br>1 alkylation (6DH 1AK) |
| y <sub>37</sub> | 1913.849      | 1913.8394     | -9.6        | +2     | 5DH 1AK                                  |
| y <sub>36</sub> | 1857.307      | 1857.3115     | 4.5         | +2     | 5DH 1AK                                  |
| y <sub>35</sub> | 1807.7728     | 1807.7772     | 4.4         | +2     | 5DH 1AK                                  |
| y <sub>24</sub> | 1281.5155     | 1281.5392     | 23.7        | +2     | 3DH 1AK                                  |

**Table S12.** Fragment ions detected from the MS/MS spectrum of the tryptic fragment from N24 to C-terminal of the clostrisin harboring 5 net dehydrations.

| Ions                  | Expected mass | Measured mass | Error (ppm) | Charge | Modification(s)      |
|-----------------------|---------------|---------------|-------------|--------|----------------------|
| <b>b<sub>2</sub></b>  | 278.1135      | 278.112       | -1.5        | +1     |                      |
| <b>b<sub>3</sub></b>  | 407.1561      | 407.1527      | -3.4        | +1     |                      |
| <b>b<sub>4</sub></b>  | 536.1987      | 536.195       | -3.7        | +1     |                      |
| <b>b<sub>5</sub></b>  | 649.2828      | 649.2798      | -3.0        | +1     |                      |
| <b>b<sub>6</sub></b>  | 796.3512      | 796.3472      | -4.0        | +1     |                      |
| <b>b<sub>7</sub></b>  | 910.3941      | 910.3971      | 3.0         | +1     |                      |
| <b>b<sub>8</sub></b>  | 1039.4367     | 1039.4385     | 1.8         | +1     |                      |
| <b>b<sub>9</sub></b>  | 1138.5051     | 1138.4998     | -5.3        | +1     |                      |
| <b>b<sub>11</sub></b> | 1381.5907     | 1381.5893     | -1.4        | +1     |                      |
| <b>b<sub>13</sub></b> | 783.839       | 783.8359      | -3.1        | +2     |                      |
| <b>y<sub>51</sub></b> |               | 1704.7775     | -15.2       | +3     | 5 dehydrations (5DH) |
|                       | 1704.7927     |               |             |        |                      |
| <b>y<sub>49</sub></b> | 1638.0874     | 1638.0852     | -2.2        | +3     | 5DH                  |
| <b>y<sub>48</sub></b> | 1595.4012     | 1595.3851     | -16.1       | +3     | 5DH                  |
| <b>y<sub>47</sub></b> | 1571.7221     | 1571.7076     | -14.5       | +3     | 5DH                  |
| <b>y<sub>46</sub></b> | 1528.708      | 1528.6978     | -10.2       | +3     | 5DH                  |
| <b>y<sub>45</sub></b> | 1491.0133     | 1491.0128     | -0.5        | +3     | 5DH                  |
| <b>y<sub>44</sub></b> | 1452.999      | 1452.9898     | -9.2        | +3     | 5DH                  |
| <b>y<sub>40</sub></b> | 2021.9153     | 2021.9089     | -6.4        | +2     | 5DH                  |
| <b>y<sub>39</sub></b> | 1986.3967     | 1986.3801     | -16.6       | +2     | 5DH                  |
| <b>y<sub>38</sub></b> | 1935.8729     | 1935.8639     | -9.0        | +2     | 5DH                  |

|                       |           |           |       |    |     |
|-----------------------|-----------|-----------|-------|----|-----|
| <b>y<sub>37</sub></b> | 1894.3543 | 1894.3549 | 0.6   | +2 | 4DH |
| <b>y<sub>36</sub></b> | 1837.8123 | 1837.8093 | -3.0  | +2 | 4DH |
| <b>y<sub>35</sub></b> | 1788.2781 | 1788.2778 | -0.3  | +2 | 4DH |
| <b>y<sub>24</sub></b> | 1262.0207 | 1262.0083 | -12.4 | +2 | 2DH |

**Table S13.** Fragment ions detected from the MS/MS spectrum of clostrisin.

| <b>Ions</b>                           | <b>Expected mass</b> | <b>Measured mass</b> | <b>Error (ppm)</b> | <b>Charge</b> |
|---------------------------------------|----------------------|----------------------|--------------------|---------------|
| <b>b<sub>5</sub></b>                  | 509.0106             | 506.2106             | -2.8               | +1            |
| <b>b<sub>6</sub></b>                  | 633.3695             | 643.2695             | 9.9                | +1            |
| <b>b<sub>7</sub></b>                  | 796.5284             | 780.3284             | -16.2              | +1            |
| <b>b<sub>8</sub></b>                  | 901.7874             | 917.3874             | 15.6               | +1            |
| <b>b<sub>9</sub></b>                  | 534.4268             | 527.7268             | -6.7               | +2            |
| <b>b<sub>10</sub></b>                 | 565.1428             | 571.2428             | 6.1                | +2            |
| <b>b<sub>11</sub></b>                 | 637.6721             | 635.2721             | -2.4               | +2            |
| <b>b<sub>12</sub></b>                 | 461.9928             | 462.1928             | 0.2                | +3            |
| <b>b<sub>12</sub></b>                 | 700.1855             | 692.7855             | -7.4               | +2            |
| <b>b<sub>18</sub></b>                 | 632.6691             | 643.2691             | 10.6               | +3            |
| <b>b<sub>19</sub></b>                 | 698.2028             | 695.3028             | -2.9               | +3            |
| <b>b<sub>19</sub></b>                 | 1046.251             | 1042.451             | -3.8               | +2            |
| <b>b<sub>23</sub></b>                 | 1297.473             | 1284.073             | -13.4              | +2            |
| <b>b<sub>27</sub></b>                 | 1040.362             | 1025.462             | -14.9              | +3            |
| <b>b<sub>28</sub></b>                 | 1056.841             | 1049.141             | -7.7               | +3            |
| <b>b<sub>30</sub></b>                 | 854.7299             | 838.1299             | -16.6              | +4            |
| <b>b<sub>31</sub></b>                 | 866.8009             | 866.4009             | -0.4               | +4            |
| <b>b<sub>31</sub></b>                 | 1145.066             | 1154.866             | 9.8                | +3            |
| <b>b<sub>33</sub></b>                 | 919.3196             | 920.4196             | 1.1                | +4            |
| <b>b<sub>38</sub></b>                 | 1075.429             | 1074.729             | -0.7               | +4            |
| <b>b<sub>38</sub></b>                 | 1432.436             | 1432.636             | 0.2                | +3            |
| <b>b<sub>40</sub></b>                 | 891.215              | 902.415              | 11.2               | +5            |
| <b>b<sub>40</sub></b>                 | 1132.567             | 1127.767             | -4.8               | +4            |
| <b>b<sub>40</sub></b>                 | 1494.453             | 1503.353             | 8.9                | +3            |
| <b>b<sub>41</sub></b>                 | 1143.425             | 1149.525             | 6.1                | +4            |
| <b>b<sub>42</sub></b>                 | 1161.236             | 1178.036             | 16.8               | +4            |
| <b>b<sub>45</sub> -H<sub>2</sub>O</b> | 1019.17              | 1004.67              | -14.5              | +5            |
| <b>b<sub>45</sub></b>                 | 1276.988             | 1260.088             | -16.9              | +4            |
| <b>b<sub>47</sub></b>                 | 1035.681             | 1031.081             | -4.6               | +5            |
| <b>b<sub>48</sub></b>                 | 1051.488             | 1045.288             | -6.2               | +5            |
| <b>b<sub>48</sub></b>                 | 1293.658             | 1306.358             | 12.7               | +4            |
| <b>b<sub>49</sub></b>                 | 1065.998             | 1065.498             | -0.5               | +5            |
| <b>b<sub>50</sub> -H<sub>2</sub>O</b> | 1082.705             | 1082.105             | -0.6               | +5            |
| <b>b<sub>51</sub> -H<sub>2</sub>O</b> | 1087.319             | 1101.919             | 14.6               | +5            |
| <b>b<sub>53</sub></b>                 | 1159.033             | 1145.533             | -13.5              | +5            |
| <b>b<sub>55</sub> -H<sub>2</sub>O</b> | 1163.455             | 1178.755             | 15.3               | +5            |
| <b>b<sub>56</sub></b>                 | 1181.165             | 1196.565             | 15.4               | +5            |
| <b>y<sub>10</sub></b>                 | 1177.117             | 1169.417             | -7.7               | +1            |

|            |          |          |       |    |
|------------|----------|----------|-------|----|
| <b>y17</b> | 902.8544 | 899.8544 | -3    | +2 |
| <b>y17</b> | 1796.602 | 1798.702 | 2.1   | +1 |
| <b>y14</b> | 769.8971 | 763.2971 | -6.6  | +2 |
| <b>y14</b> | 1525.087 | 1525.587 | 0.5   | +1 |
| <b>y5</b>  | 634.245  | 633.245  | -1    | +1 |
| <b>y52</b> | 1319.441 | 1336.641 | 17.2  | +4 |
| <b>y15</b> | 813.9017 | 814.8017 | 0.9   | +2 |
| <b>y15</b> | 1641.596 | 1628.596 | -13   | +1 |
| <b>y23</b> | 1174.808 | 1171.008 | -3.8  | +2 |
| <b>y19</b> | 972.689  | 978.889  | 6.2   | +2 |
| <b>y19</b> | 1959.971 | 1956.771 | -3.2  | +1 |
| <b>y2</b>  | 253.67   | 236.07   | -17.6 | +1 |
| <b>y58</b> | 1187.573 | 1196.573 | 9     | +5 |
| <b>y11</b> | 1237.754 | 1240.454 | 2.7   | +1 |
| <b>y18</b> | 936.573  | 935.373  | -1.2  | +2 |
| <b>y8</b>  | 965.276  | 979.376  | 14.1  | +1 |
| <b>y40</b> | 983.079  | 988.479  | 5.4   | +4 |
| <b>y20</b> | 1039.931 | 1035.431 | -4.5  | +2 |
| <b>y12</b> | 1310.186 | 1327.486 | 17.3  | +1 |
| <b>y30</b> | 1008.437 | 1008.137 | -0.3  | +3 |
| <b>y30</b> | 1525.502 | 1511.702 | -13.8 | +2 |
| <b>y41</b> | 1344.147 | 1346.647 | 2.5   | +3 |
| <b>y3</b>  | 357.5129 | 350.1129 | -7.4  | +1 |
